# Supplementary material for: Multi-component carbon-based composites containing high crystallinity NiBDC as high-performance electrodes for supercapacitors
Source: Royal Society of Chemistry journal article supplement (doi:10.1039/d3cc03392a), 2023-01-01
Supplement: d3cc03392a1.pdf [file d3cc03392a1.pdf]

## Supporting information

### 1. Method

#### 1.1 Materials

All chemicals were used without any further purification. Terephthalic acid ( $\text{H}_2\text{BDC}$ ), Sodium sulfate ( $\text{Na}_2\text{SO}_4$ ), Sodium hydroxide ( $\text{NaOH}$ ) and Nickel(II) nitrate hexahydrate ( $\text{Ni}(\text{NO}_3)_2 \cdot 6\text{H}_2\text{O}$ ) were acquired from Tianjin Yongda Chemical Reagents. N,N-Dimethylformamide (DMF) and Carboxymethylcellulose (CMC) were purchased from Sinopharm Chemical Reagent Co., Ltd.

#### 1.2 Synthesis of C-Ni/NiO/NiBDC

3 mmol  $\text{H}_2\text{BDC}$  and 6 mmol  $\text{NaOH}$  were dissolved in 15 mL DI water, and then 265 mg CMC was added into the solution. The above mixture was stirred for 3 h at room temperature. The mixture was precooled in the refrigerator, and then was treated by freeze-drying process for 8 hours. Subsequently, 5 mmol  $\text{Ni}(\text{NO}_3)_2 \cdot 6\text{H}_2\text{O}$  and the obtained precursor were put into 10 mL DMF and transferred into Teflon-lined stainless steel autoclave at 140 °C for 12 hours. After cooling down the room temperature, the samples were carefully rinsed several times with DMF and ethanol, and dried at 60 °C under vacuum. Finally, the samples were calcined at 350 °C for 3 h, the obtained samples were donated as C-Ni/NiO/NiBDC.

#### 1.3 Synthesis of C-Ni-CMC

For comparison, the similar synthesis procedure was carried out merely the

different sequence of ligands and metal ions. Typically, 5 mmol  $\text{Ni}(\text{NO}_3)_2 \cdot 6\text{H}_2\text{O}$  and 6 mmol NaOH were dissolved in 15 mL DI water, and then 265 mg CMC was added into the solution. The above mixture was stirred for 3 h at room temperature. The mixture was precooled in the refrigerator, and then was treated by freeze-drying process for 8 hours. Subsequently, 3 mmol  $\text{H}_2\text{BDC}$  and the obtained precursor were put into 10 mL DMF and transferred into Teflon-lined stainless steel autoclave at 140 °C for 12 hours. After cooling down to the room temperature, the samples were carefully rinsed several times with DMF and ethanol, and dried at 60 °C under vacuum. Finally, the samples were calcined at 350 °C for 3 h, the obtained samples were donated as C-NiCMC.

#### **1.4 Synthesis of C-NiBDC**

0.7 mmol  $\text{H}_2\text{BDC}$  and 0.7 mmol  $\text{Ni}(\text{NO}_3)_2 \cdot 6\text{H}_2\text{O}$  were dissolved in 10 mL DMF and 0.6 mL  $\text{H}_2\text{O}$ , the solution was stirred for 15 min at room temperature to form a homogenous solution. Then, the above solution was transferred into a Teflon-lined stainless autoclave and maintained at 140 °C for 12 hours. After cooling down to room temperature, the sample was washed with DMF and ethanol and dried at 60 °C under vacuum. The samples were calcined at 350 °C for 3 h, the obtained samples were donated as C-NiBDC.

#### **1.5 Synthesis of C-NiBDC-CMC**

The as-prepared NiBDC was dispersed in 15mL DI water, and then 265 mg CMC was added into the solution. The above solution was stirred for 3 h at room temperature. The mixture was precooled in the refrigerator, and then was treated by freeze-drying process for 8 hours. The samples were calcined at 350 °C for 3 h, the obtained samples were donated as C-NiBDC-CMC.

### **1.6 Characterization**

The morphology, compositions and size of the all samples were investigated using a scanning electron microscope (SEM, HITACHI, SU8010, Japan). Transmission electron microscopy (TEM) images and high-resolution transmission electron microscopy (HRTEM) images were taken on a Tecnai G2 F20 S-Twin electron microscope. The crystal structures of the samples were characterized by an X-ray powder diffractometer (XRD, PANalytical, X'Pert Pro, Netherlands). XPS measurements were performed on a Thermo K-Alpha XPS instrument (Thermo Fisher Scientific, USA).

### **1.7 Electrochemical measurements**

All electrochemical tests were performed on the Shanghai Chenhua 660E workstation. The as-prepared samples were used as working electrode, saturated calomel as the reference electrode, Pt foil as the counter electrode, and 1 M Na<sub>2</sub>SO<sub>4</sub> as the electrolyte. The as-prepared samples were electrochemically tested in a three-electrode system by means of

cyclic voltammetry (CV), galvanostatic charge/discharge (GCD) and electrochemical impedance spectroscopy (EIS). The method for preparing electrode is as follows: the as-prepared samples, PVDF and super P in the ratio of 7:2:1 were mixed and ground, and then the N-methyl-2-pyrrolidone(NMP) was added to form slurry. Afterwards, the slurry was coated on the graphite foil ( $1 \times 1 \text{ cm}^2$ ), and the obtained graphite foil was dried at  $80^\circ$  for 8 hours. The mass of each electrode was around 0.7 mg.

The specific capacitance of the supercapacitors can be calculated by galvanostatic discharge-charge (GCD) test as following equation:

$$C_{m=m} = \frac{I * \Delta t}{\Delta V}$$

Where  $C_m$  is the specific capacitance of the capacitors ( $\text{F g}^{-1}$ );  $I$  is the current of the charge/discharge process;  $\Delta t$  is the discharging time period for the potential change  $\Delta V$ ;  $m$  is the mass loading of the active material on the working electrode.

Energy density and power density of the supercapacitors can be calculated as following equation:

$$E = \frac{1}{2} C \Delta V^2$$

$$P = \frac{E}{\Delta t}$$

Where  $E$  ( $\text{Wh kg}^{-1}$ ) is the energy density,  $C$  ( $\text{F g}^{-1}$ ) is the mass specific capacitance,  $\Delta V$  (V) is the voltage window,  $P$  ( $\text{W kg}^{-1}$ ) refers to the power

density and  $\Delta t$  is the discharge time.

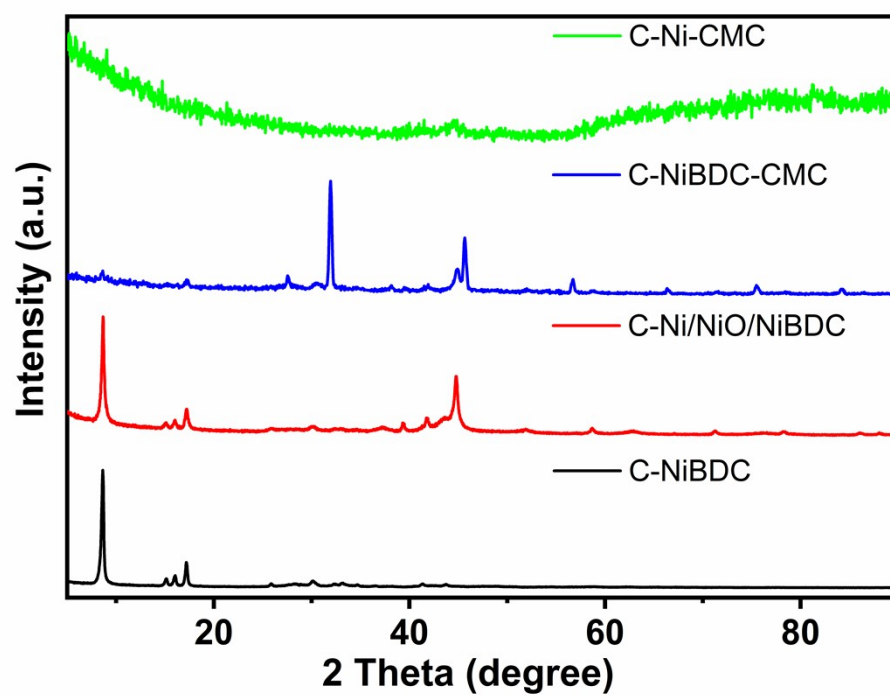

**Fig. S1.** XRD patterns of C-Ni/NiO/NiBDC, C-NiBDC, C-Ni-CMC and C-NiBDC-CMC.

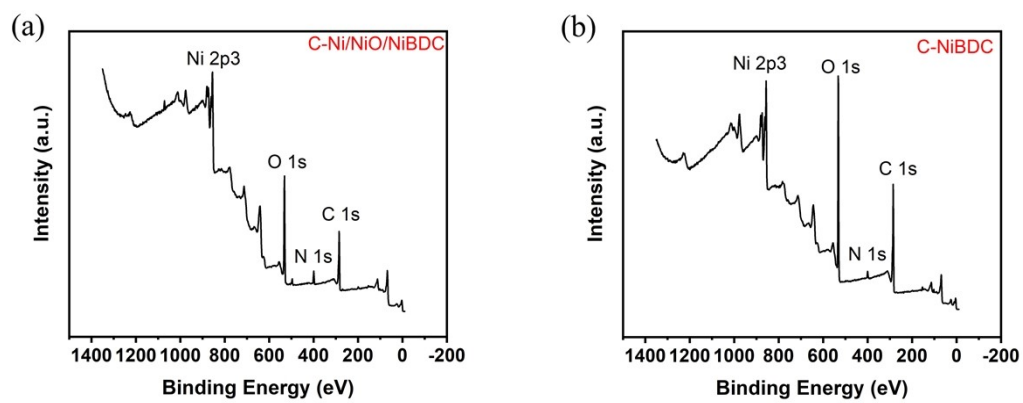

**Fig. S2.** XPS survey spectra of C-Ni/NiO/NiBDC (a) and C-NiBDC (b)

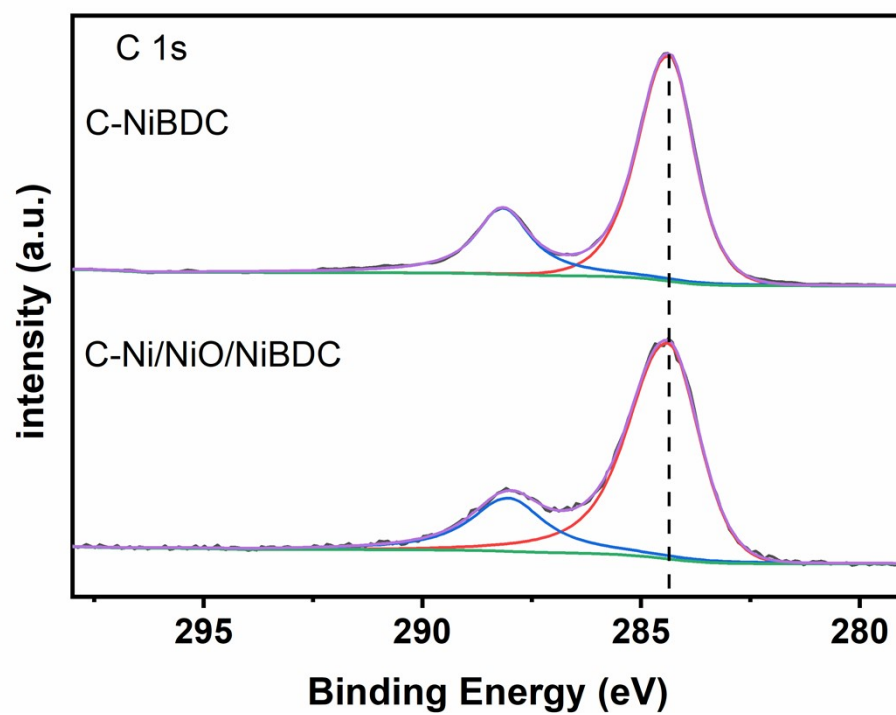

**Fig. S3.** High-resolution XPS spectra of C 1s for C-Ni/NiO/NiBDC and C-NiBDC.

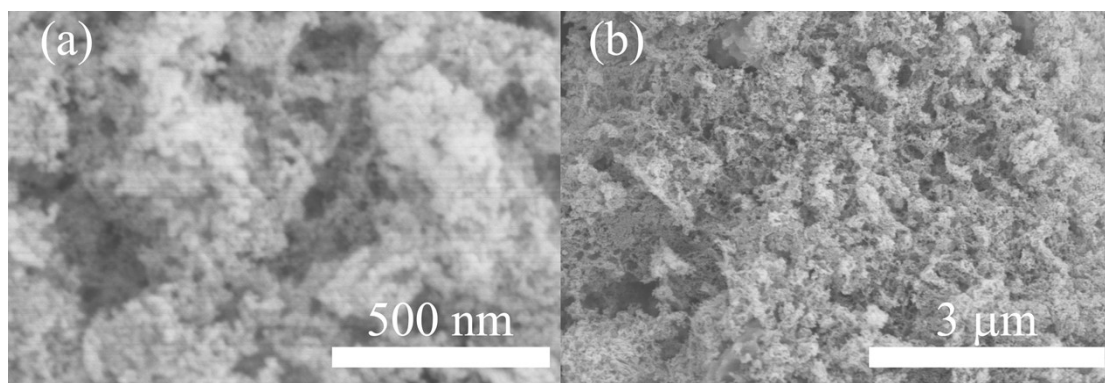

**Fig. S4.** SEM images of C-NiBDC.

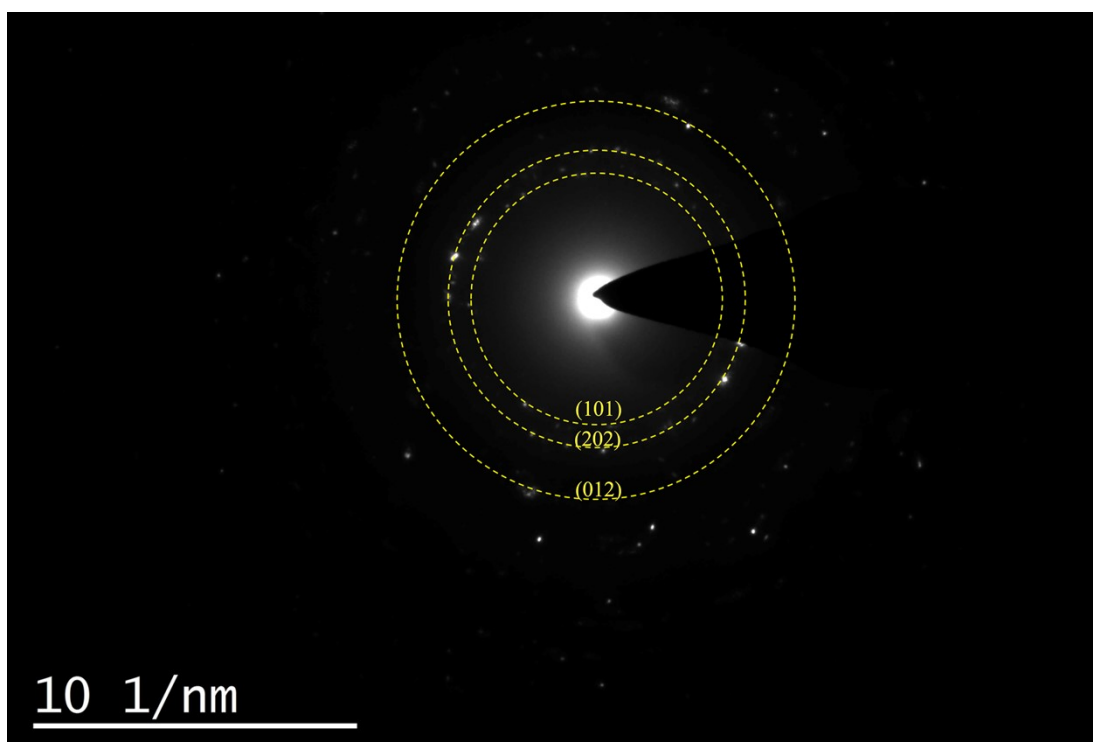

Fig. S5. SAED pattern of the C-Ni/NiO/NiBDC.

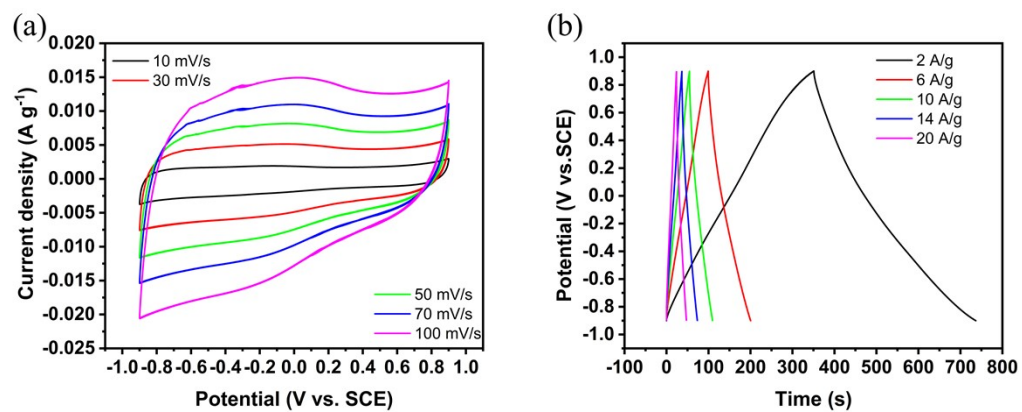

**Fig. S6.** (a) CV curves and (b) GCD curves of C-NiBDC.

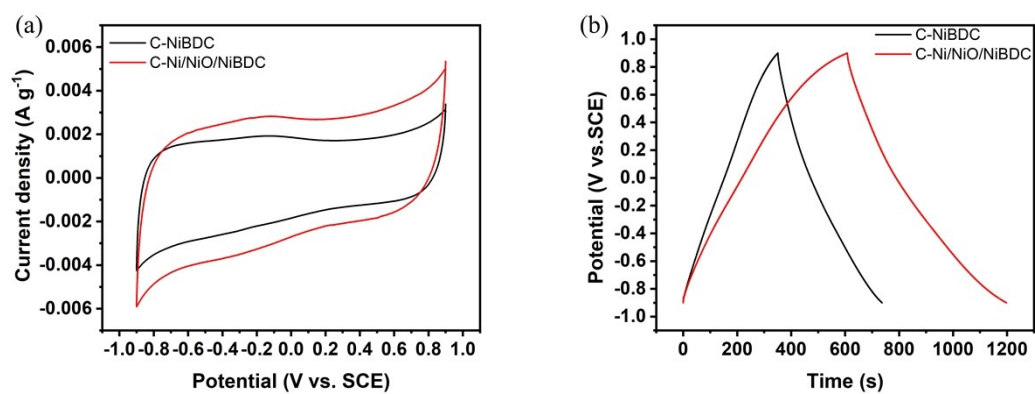

**Fig. S7.** (a) CV curves at  $10 \text{ mV s}^{-1}$  and (b) GCD curves at  $2 \text{ A g}^{-1}$  of C-NiBDC and C-Ni/NiO/NiBDC.

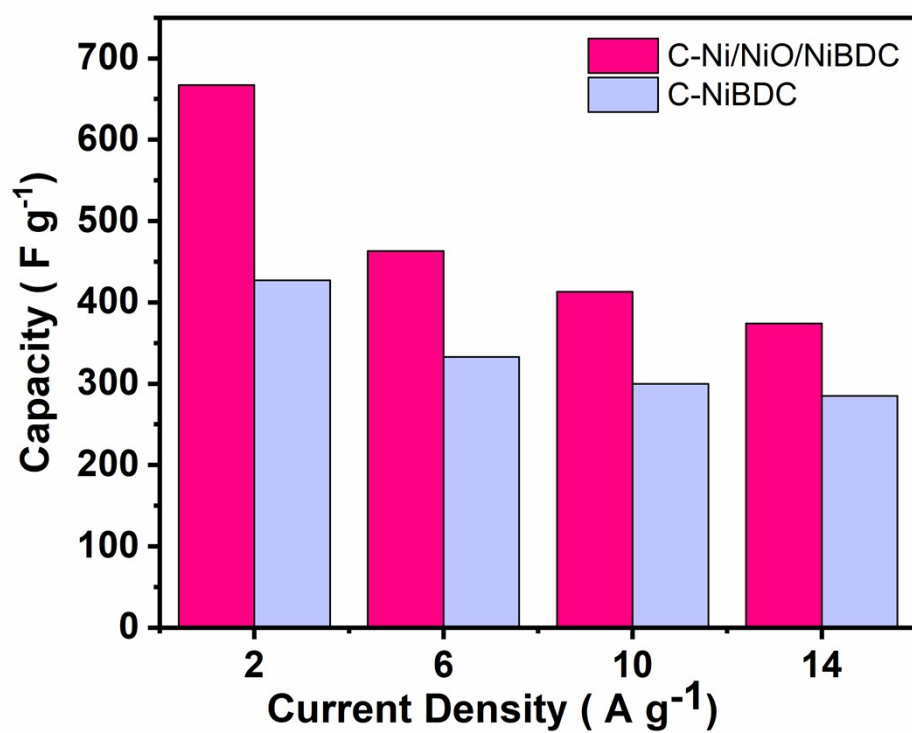

**Fig. S8.** Rate performance of C-Ni/NiO/NiBDC and C-NiBDC

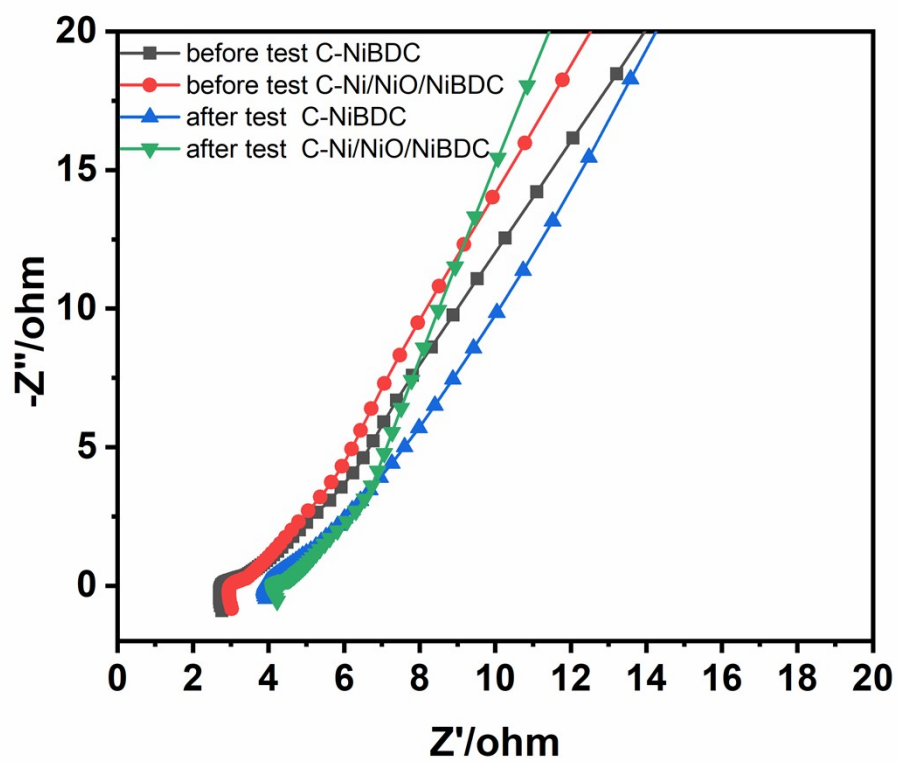

**Fig. S9.** Nyquist plots of before and after C-Ni/NiO/NiBDC and C-NiBDC testing

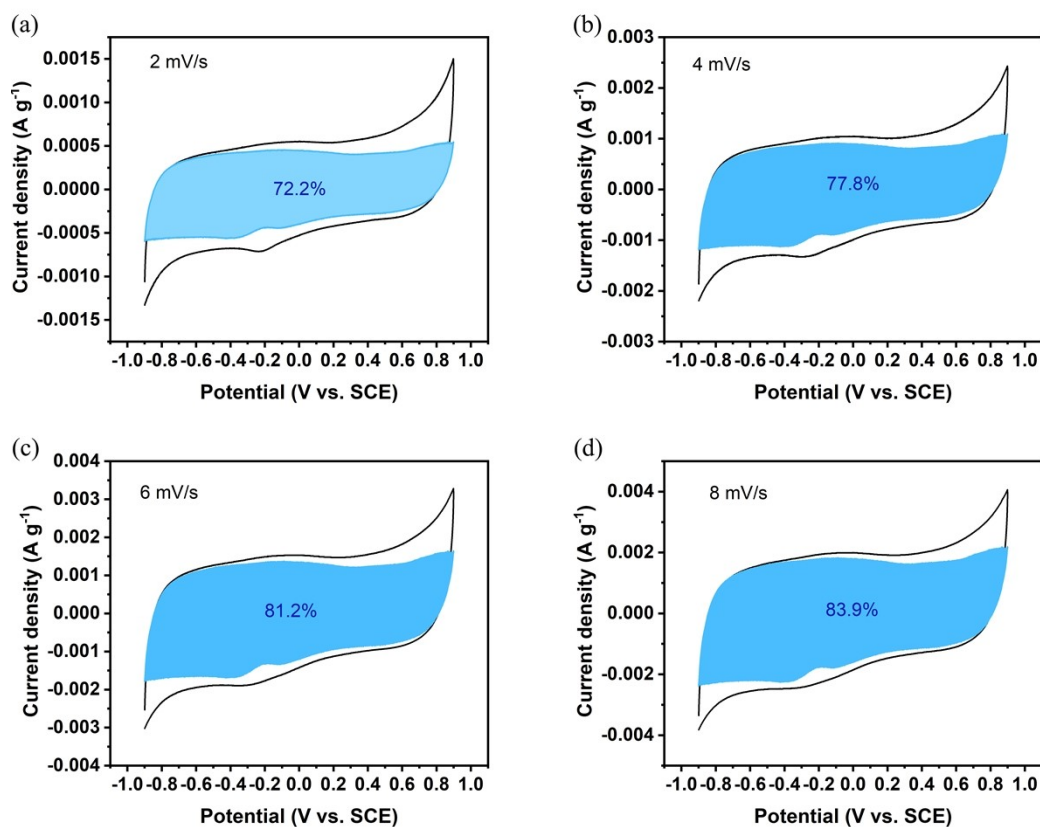

**Fig. S10.** Capacitive and diffusion of contribution of C-Ni/NiO/NiBDC at different scan rates:  $2 \text{ mV s}^{-1}$ (a);  $4 \text{ mV s}^{-1}$ (b);  $6 \text{ mV s}^{-1}$  (c) and  $8 \text{ mV s}^{-1}$ (d).

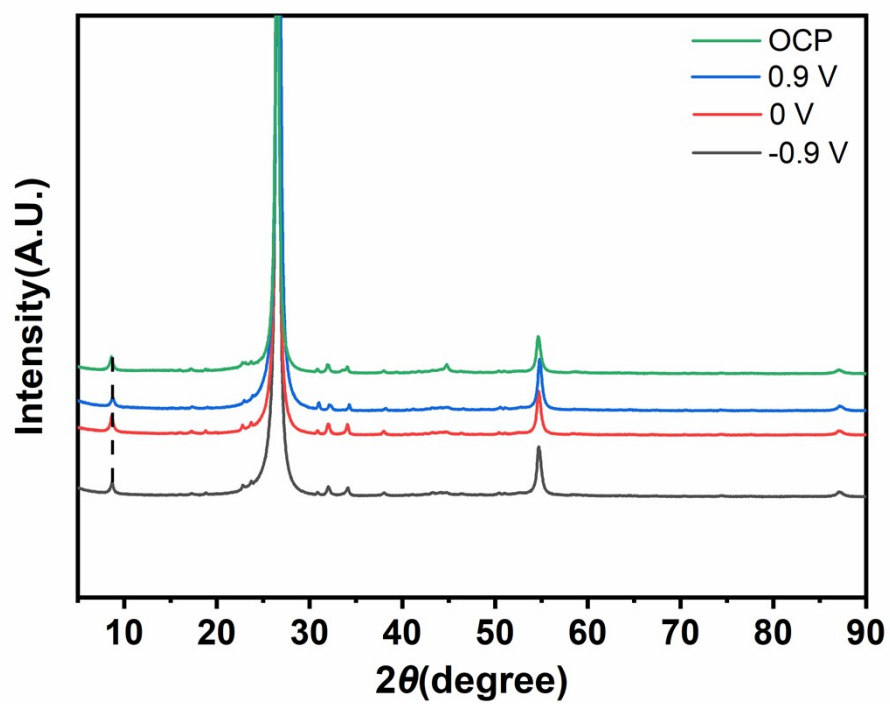

Fig. S11. XRD patterns of C-Ni/NiO/NiBDC during the discharge process.

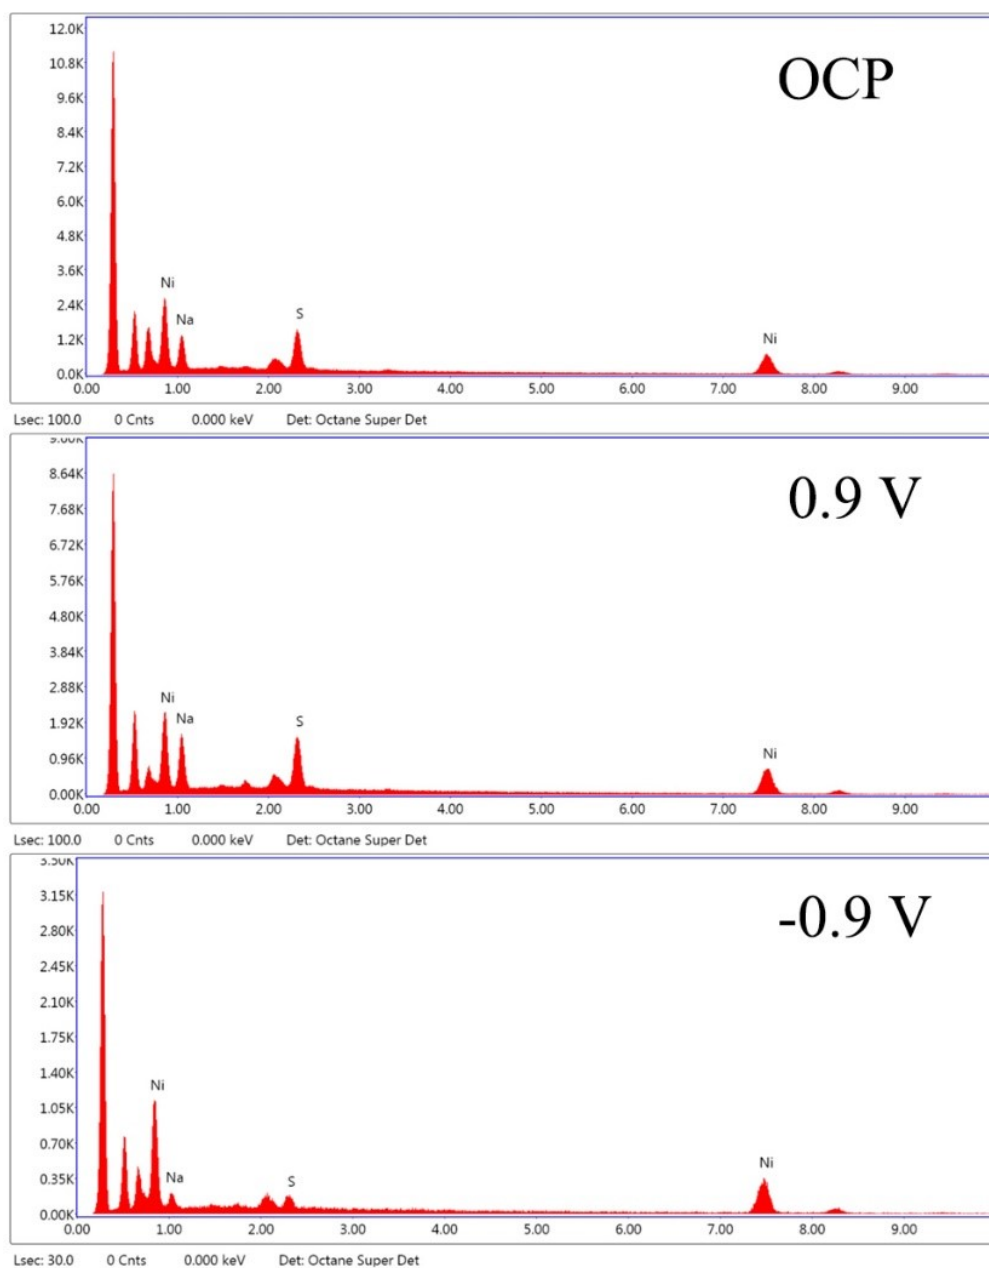

**Fig. S12.** EDX of C-Ni/NiO/NiBDC during the discharge process

**Table S1.** Element proportion of C-Ni/NiO/NiBDC during the discharge process

|           | <b>OCP(%)</b> | <b>0.9 V(%)</b> | <b>-0.9 V(%)</b> |
|-----------|---------------|-----------------|------------------|
| <b>Na</b> | 27.95         | 28.99           | 15.69            |
| <b>S</b>  | 13.56         | 13.22           | 3.46             |
| <b>Ni</b> | 58.49         | 57.79           | 80.85            |

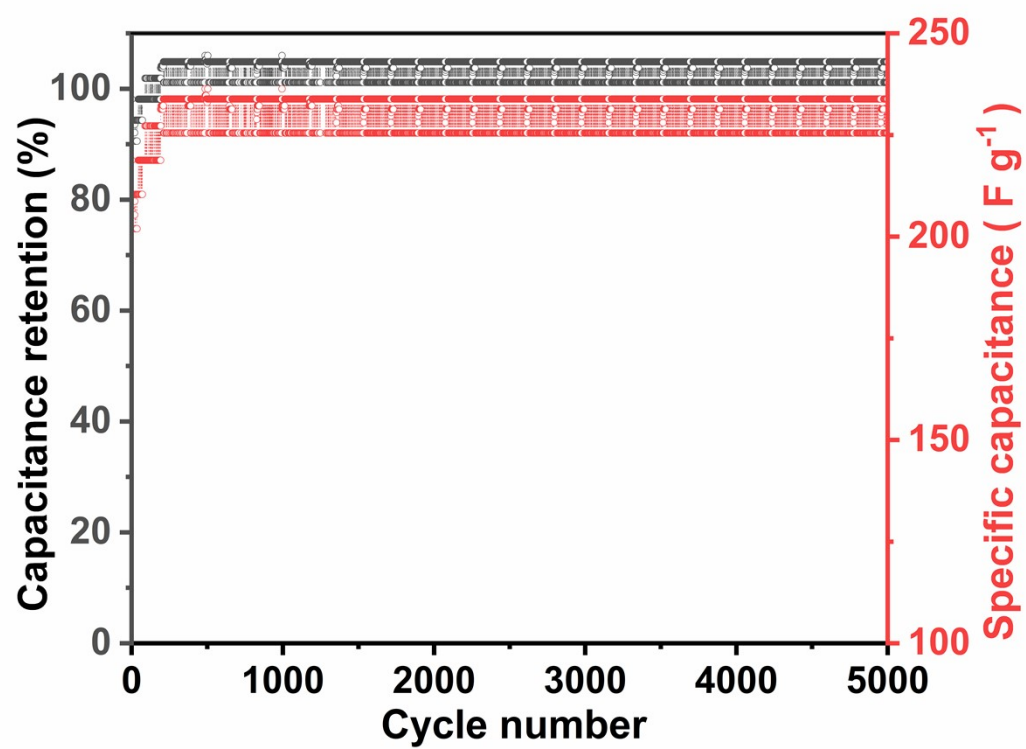

Fig. S13. Capacitance retention plot of the supercapacitors for 5,000 cycles.

**Table S2.** Comparison of carbon-based composites containing Ni species as electrodes as supercapacitors.

| <b>Samples</b>        | <b>Capacitance (F/g)</b> | <b>References</b> |
|-----------------------|--------------------------|-------------------|
| <b>NiO/C</b>          | 260                      | 1                 |
| <b>NiO/CMC</b>        | 294                      | 2                 |
| <b>N/C</b>            | 381                      | 3                 |
| <b>C</b>              | 315                      | 4                 |
| <b>NiNOG</b>          | 532                      | 5                 |
| <b>NiCo-MOF</b>       | 134                      | 6                 |
| <b>TOCN/GO</b>        | 398                      | 7                 |
| <b>C</b>              | 274                      | 8                 |
| <b>C/S</b>            | 63.6                     | 9                 |
| <b>C-Ni/NiO/NiBDC</b> | 667                      | This Work         |

## References

1. S. Wang, W. Li, L. Xin, M. Wu, W. Sun and X. Lou, *Chemical Engineering Journal*, 2017, **321**, 546-553.
2. M. Yu, Y. Han, J. Li and L. Wang, *Chemical Engineering Journal*, 2017, **324**, 287-295.
3. W. Yan, Z. Meng, M. Zou, H. Miao, F. Ma, R. Yu, W. Qiu, X. Y. Liu and N. Lin, *Chemical Engineering Journal*, 2020, **381**.
4. Y. Xie, C. Yu, W. Guo, L. Ni, Z. Wang, J. Yu, L. Yang, R. Fu, K. Liu and J. Qiu, *Nano Research*, 2021, **15**, 1399-1408.
5. L. Liu, Z. Xie, X. Du, D. Yu, B. Yang, B. Li and X. Liu, *Chemical Engineering Journal*, 2022, **430**.
6. M. Ojha, B. Wu and M. Deepa, *ACS Appl Mater Interfaces*, 2020, **12**, 42749-42762.
7. Q. Yang, J. Yang, Z. Gao, B. Li and C. Xiong, *ACS Applied Energy Materials*, 2019, **3**, 1145-1151.
8. J. Sun, W. Li, L. E, Z. Xu, C. Ma, Z. Wu and S. Liu, *Journal of Power Sources*, 2019, **438**.
9. C. Dang, Z. Huang, Y. Chen, S. Zhou, X. Feng, G. Chen, F. Dai and H. Qi, *ACS Appl Mater Interfaces*, 2020, **12**, 21528-21538.
